# Supplementary material for: Effects of Differing Monomer Compositions on Properties of P(3HB-co-4HB) Synthesized by Aneurinibacillus sp. H1 for Various Applications
Source: MDPI journal article supplement (doi:10.3390/polym14102007), 2022-05-13
Supplement: s1 [file s1]

Supplementary material

# Effects of Differing Monomer Compositions on Properties of P(3HB-co-4HB) Synthesized by *Aneurinibacillus* sp. H1 for Various Applications

Aneta Pospisilova, Juraj Vodicka, Monika Trudicova, Zuzana Juglova, Jiri Smilek, Premysl Mencik, Jiri Masilko, Eva Slaninova, Veronika Melcova, Michal Kalina, Stanislav Obruca and Petr Sedlacek \*

Faculty of Chemistry, Brno University of Technology, Purkynova 118, 612 00 Brno, Czech Republic; xcpospisilovaan@fch.vut.cz (A.P.); xcvodickaj@vutbr.cz (J.V.); xctrudicova@fch.vut.cz (M.T.); zuzana.juglova@vut.cz (Z.J.); smilek@fch.vut.cz (J.S.); mencik@fch.vut.cz (P.M.); masilko@fch.vut.cz (J.M.); xcslaninovae@fch.vut.cz (E.S.); xcmelcova@fch.vut.cz (V.M.); kalina-m@fch.vut.cz (M.K.); obruca@fch.vut.cz (S.O.)

\* Correspondence: sedlacek-p@fch.vut.cz; Tel.: +420-541-149-486

**Table S1.** Composition of microelement solution (MES).

| Component                                          | Amount [g/L] |
|----------------------------------------------------|--------------|
| $\text{FeCl}_3 \times 6 \times \text{H}_2\text{O}$ | 9.7          |
| $\text{CaCl}_2 \times 2 \times \text{H}_2\text{O}$ | 7.8          |
| $\text{CuSO}_4 \times 5 \times \text{H}_2\text{O}$ | 0.156        |
| $\text{CoCl}_2 \times 6 \times \text{H}_2\text{O}$ | 0.119        |
| $\text{NiCl}_2 \times 6 \times \text{H}_2\text{O}$ | 0.118        |
| $\text{CrCl}_2$                                    | 0.062        |
| 0,1 M HCl                                          | 1000 mL      |

**Table S2.** Composition of trace element solution (TES).

| Component                                          | Amount [g/L] |
|----------------------------------------------------|--------------|
| EDTA                                               | 50           |
| $\text{FeCl}_3$                                    | 8.3          |
| $\text{ZnCl}_2$                                    | 0.84         |
| $\text{CuCl}_2 \times 2 \times \text{H}_2\text{O}$ | 0.13         |
| $\text{CoCl}_2 \times 6 \times \text{H}_2\text{O}$ | 0.1          |
| $\text{MnCl}_2 \times 6 \times \text{H}_2\text{O}$ | 0.016        |
| $\text{H}_3\text{BO}_3$                            | 0.1          |
| Water                                              | 1000 mL      |
